# Supplementary material for: Identification of new risk factors for rolandic epilepsy: CNV at Xp22.31 and alterations at cholinergic synapses
Source: PubMed Central journal article supplement (PMC6119347; doi:10.1136/jmedgenet-2018-105319), 2018-05-22
Supplement: jmedgenet-2018-105319supp001.pdf [file jmedgenet-2018-105319supp001.pdf]

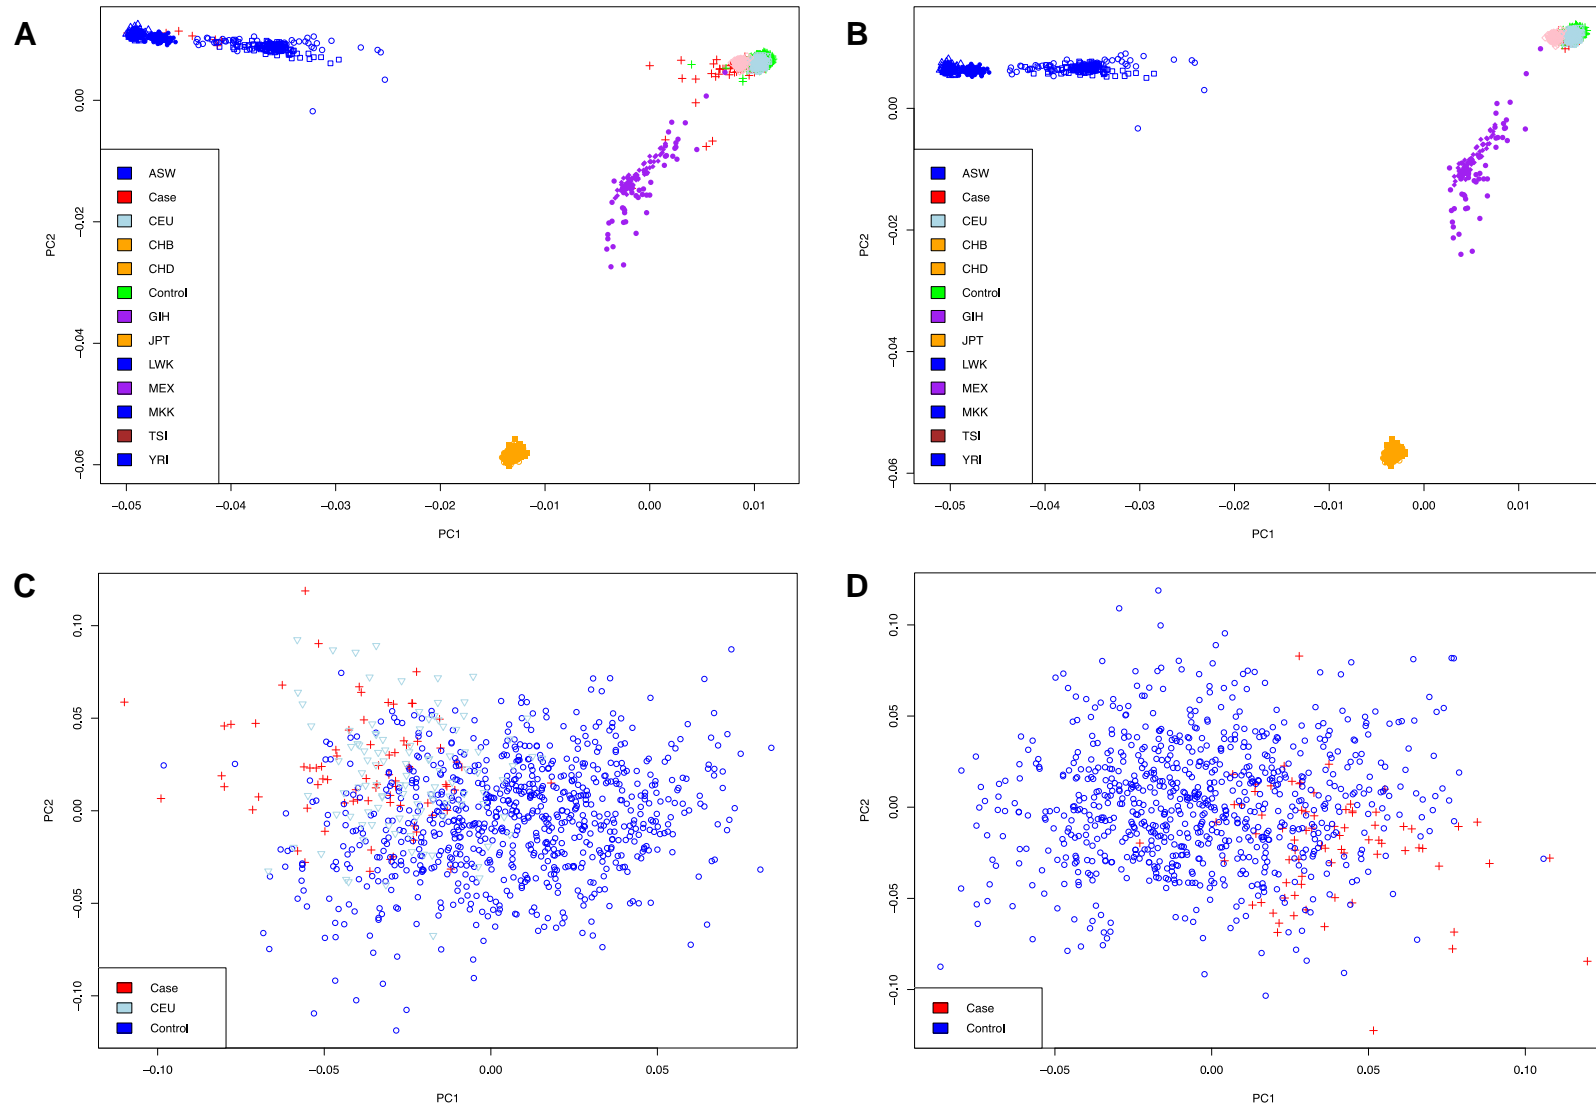

**Supplementary Figure S1(A)** The first two principal components were calculated combining HapMap 3 individuals with the RE (Case) and NL4 (Control) datasets. **(B)** Individuals of non-European ancestry were removed if they were  $\pm 10$  s.d. from the HapMap CEU mean considering

the first four Principal Components (PCs). A subsequent removal of samples deviating by more than 5 s.d. from the stratum mean of the first two PCs was also performed (Calculated on Genotyped data only). **(C)** Individuals remaining after removing population outliers resulted in a homogenous European sample. **(D)** Individuals remaining after removing population outliers resulting in a homogenous group between the RE cases and NL4 datasets.

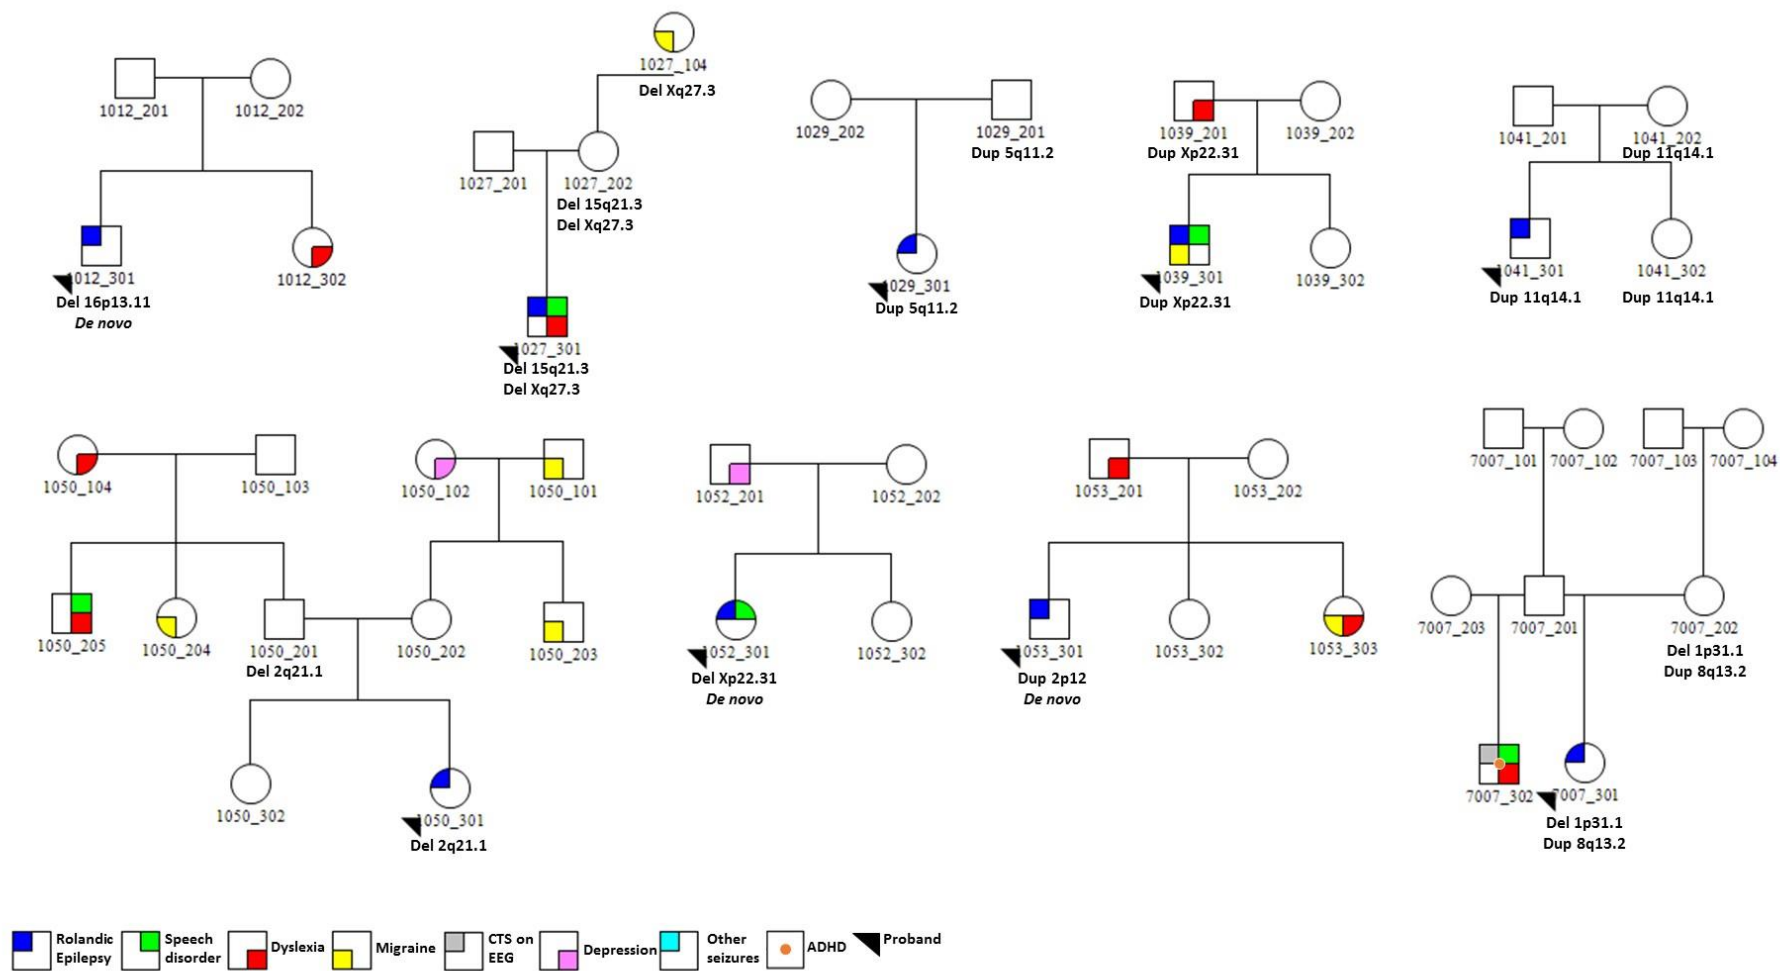

**Supplementary Figure S2 (cont. on next page).** Pedigree diagrams of families with RE and hotpost or rare CNVs where inheritance information was available. Circles indicate females, and squares males. Details of CNVs are found below individuals that carry that CNV.

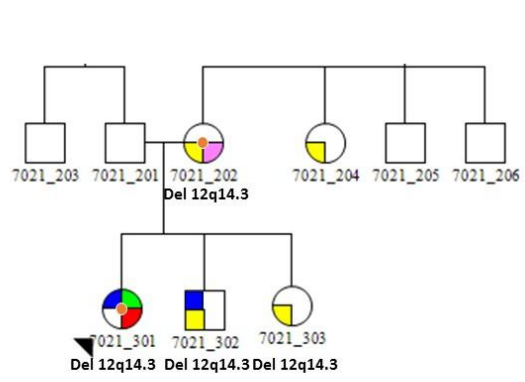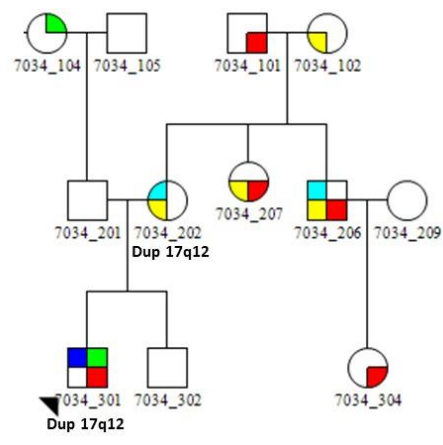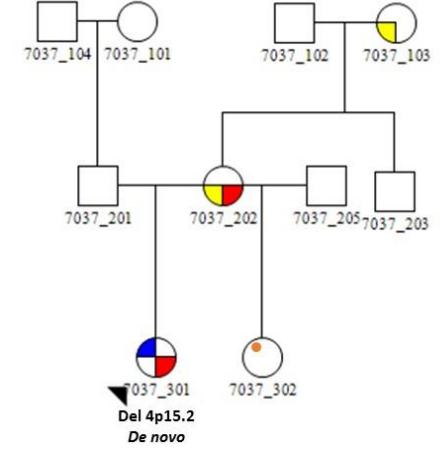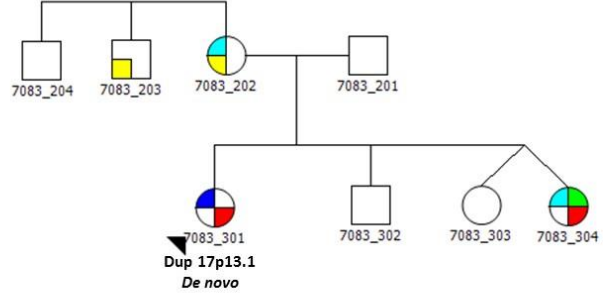

- Rolandic Epilepsy
- Speech disorder
- Dyslexia
- Migraine
- CTS on EEG
- Depression
- Other seizures
- ADHD
- Proband

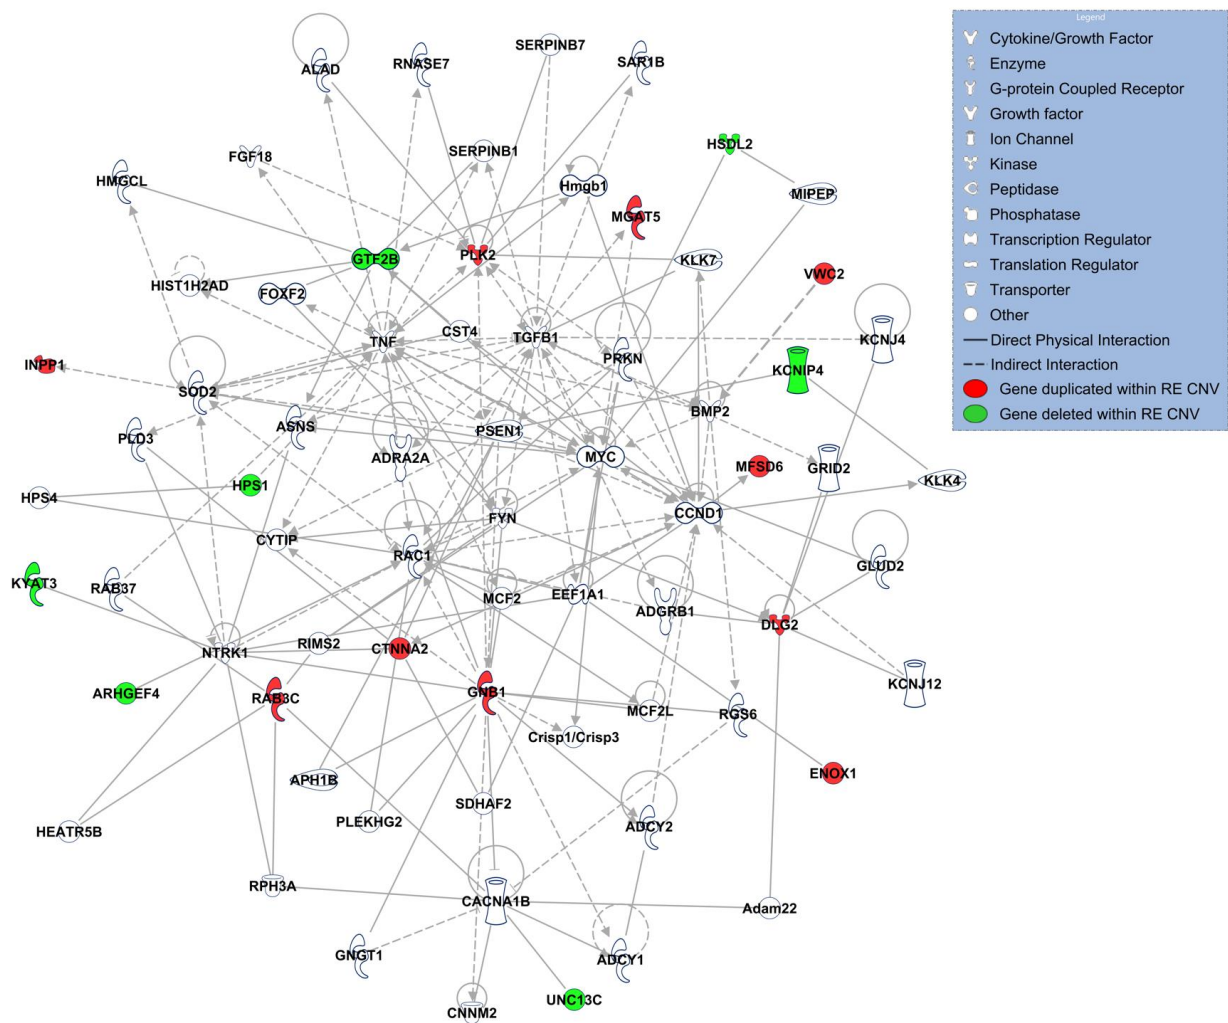

**Supplementary Figure S3.** Ingenuity Pathway Analysis of genes disrupted by CNV from European RE cases with high brain expression, creating a network of up to 70 genes. White symbols are genes added by IPA during network generation due to direct physical, or indirect (e.g. via activation) interactions with the input list.

CHOLINERGIC SYNAPSE

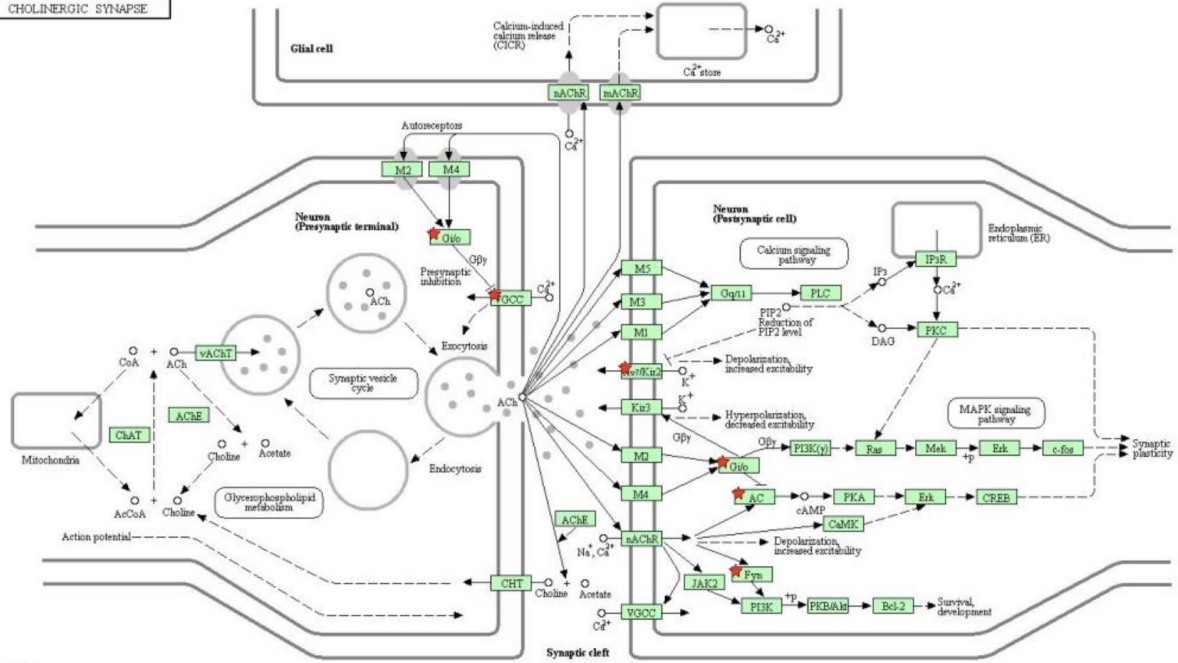

04725.201517  
© Kanehisa Laboratories

Objects

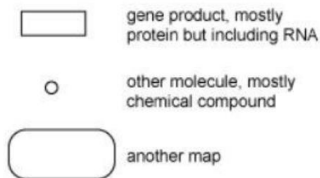

Gene expression relations

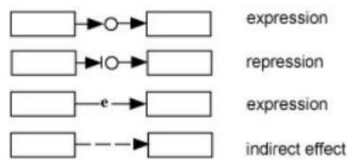

Arrows

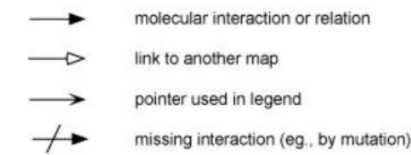

Enzyme-enzyme relations

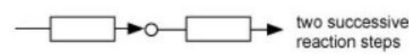

Protein-protein interactions

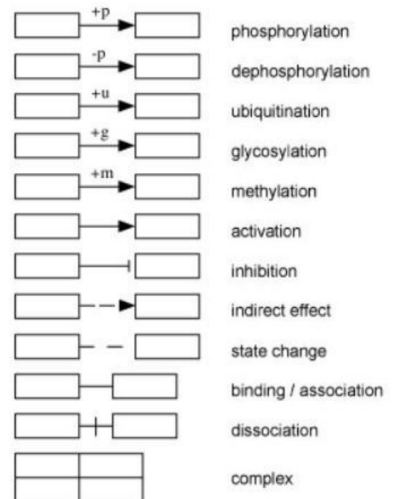

**Supplementary Figure S4.** KEGG pathway of cholinergic synapse from <http://www.kegg.jp/>. Red stars indicate genes that are from the IPA in Supplementary Figure 2. Enrichment analysis carried out within Enrichr <http://amp.pharm.mssm.edu/Enrichr/>.

**Supplementary Table S1**

| Cohort | Sample Source   | Original Sample (N) | Family Members (N) | Cases (N) | Controls (N) |
|--------|-----------------|---------------------|--------------------|-----------|--------------|
| RE     | UK              | 537                 | 412                | 125       | -            |
| NL4    | The Netherlands | 800                 | -                  | -         | 800          |

The original Dutch cohort included 2,262 controls (dataset NL4)<sup>1</sup>. 800 controls from this dataset were randomly selected and used in the present study.

**Supplementary Table S2**

| Cohort | Individuals after QC |           |              | SNPs          |              |
|--------|----------------------|-----------|--------------|---------------|--------------|
|        | Samples (N)          | Cases (N) | Controls (N) | Before QC (N) | After QC (N) |
| RE     | 76                   | 76        | -            | 538,448       | 227,632      |
| NL4    | 795                  | -         | 795          | 719,665       | 612,666      |

After Quality Control, a total of 222,612 SNPs overlapped between the two datasets. Only affected individuals from the RE dataset were included in the QC to determine the population structure.

**Supplementary Table S3**

| Case and Gene ID/hotspot  | References |
|---------------------------|------------|
| S218, <i>KLHL17</i>       | 2 3        |
| SFR, 1q21.1               | 4 5        |
| 1050-301, <i>ARHGEF4</i>  | 6          |
| RK044, <i>KCTD7</i>       | 7          |
| RK011, <i>GRIN2A</i>      | 8-10       |
| 1012-301, 16p13.11        | 11-13      |
| 7083-301, <i>ARHGEF15</i> | 14         |
| All with Xp22.31 CNV      | 2 10 15-21 |
| 7007-301, <i>PTGER3</i>   | 22         |
| RK029, <i>ASH1L</i>       | 23         |
| 1053-301, <i>CTNNA2</i>   | 24         |
| S218, <i>ERBB4</i>        | 25 26      |
| 7037-301, <i>KCNIP4</i>   | 27         |
| S52, <i>GRID2</i>         | 28         |
| 1029-301, <i>PLK2</i>     | 29 30      |
| 7007-301, <i>ARFGEF1</i>  | 31 32      |
| SSM, <i>CTNNA3</i>        | 33 34      |
| S38, <i>NRG3</i>          | 35         |
| 1041-301, <i>DLG2</i>     | 36         |
| 7021-301, <i>GRIP1</i>    | 37 38      |
| 1027-301, <i>UNC13</i>    | 39         |
| SMJ, <i>SMAD3</i>         | 40         |
| 7034-301, <i>ASIC2</i>    | 41         |
| NVH, <i>PTPRT</i>         | 42         |
| 1027-301, <i>SLITRK2</i>  | 43         |

Additional references for genes and regions disrupted by RE CNV and detailed in Tables 1 and 2 in the main text.

| Term                                                                       | Overlap | P-value  | Adjusted P-value | Z-score | Combined Score | Genes                                                               |
|----------------------------------------------------------------------------|---------|----------|------------------|---------|----------------|---------------------------------------------------------------------|
| Cholinergic synapse_Homo sapiens_hsa04725                                  | 8/111   | 5.55E-09 | 9.60E-07         | -2.06   | 39.18          | GNGT1;KCNJ4;KCNJ12;GNB1;CACNA1B;ADCY2;FYN;ADCY1                     |
| Pathways in cancer_Homo sapiens_hsa05200                                   | 12/397  | 1.41E-08 | 1.22E-06         | -2.08   | 37.65          | NTRK1;GNGT1;BMP2;TGFB1;CCND1;MYC;FGF18;GNB1;ADCY2;ADCY1;CTNNA2;RAC1 |
| GABAergic synapse_Homo sapiens_hsa04727                                    | 5/88    | 1.52E-05 | 6.20E-04         | -1.80   | 19.92          | GNGT1;GNB1;CACNA1B;ADCY2;ADCY1                                      |
| Morphine addiction_Homo sapiens_hsa05032                                   | 5/91    | 1.79E-05 | 6.20E-04         | -1.75   | 19.07          | GNGT1;GNB1;CACNA1B;ADCY2;ADCY1                                      |
| Hippo signaling pathway_Homo sapiens_hsa04390                              | 6/153   | 1.73E-05 | 6.20E-04         | -1.66   | 18.25          | BMP2;TGFB1;DLG2;CCND1;MYC;CTNNA2                                    |
| MAPK signaling pathway_Homo sapiens_hsa04010                               | 7/255   | 3.35E-05 | 8.27E-04         | -1.85   | 19.01          | NTRK1;TGFB1;MYC;FGF18;CACNA1B;RAC1;TNF                              |
| Retrograde endocannabinoid signaling_Homo sapiens_hsa04723                 | 5/101   | 2.97E-05 | 8.27E-04         | -1.80   | 18.74          | GNGT1;GNB1;CACNA1B;ADCY2;ADCY1                                      |
| Colorectal cancer_Homo sapiens_hsa05210                                    | 4/62    | 6.96E-05 | 1.51E-03         | -1.73   | 16.55          | TGFB1;CCND1;MYC;RAC1                                                |
| Thyroid cancer_Homo sapiens_hsa05216                                       | 3/29    | 1.47E-04 | 2.82E-03         | -1.36   | 11.98          | NTRK1;CCND1;MYC                                                     |
| Oxytocin signaling pathway_Homo sapiens_hsa04921                           | 5/158   | 2.47E-04 | 3.88E-03         | -1.71   | 14.20          | KCNJ4;CCND1;KCNJ12;ADCY2;ADCY1                                      |
| TGF-beta signaling pathway_Homo sapiens_hsa04350                           | 4/84    | 2.27E-04 | 3.88E-03         | -1.60   | 13.44          | BMP2;TGFB1;MYC;TNF                                                  |
| HTLV-I infection_Homo sapiens_hsa05166                                     | 6/258   | 3.09E-04 | 4.11E-03         | -1.64   | 13.28          | TGFB1;CCND1;MYC;ADCY2;ADCY1;TNF                                     |
| Dilated cardiomyopathy_Homo sapiens_hsa05414                               | 4/90    | 2.96E-04 | 4.11E-03         | -1.56   | 12.71          | TGFB1;ADCY2;ADCY1;TNF                                               |
| Circadian entrainment_Homo sapiens_hsa04713                                | 4/95    | 3.64E-04 | 4.50E-03         | -1.57   | 12.40          | GNGT1;GNB1;ADCY2;ADCY1                                              |
| AGE-RAGE signaling pathway in diabetic complications_Homo sapiens_hsa04933 | 4/101   | 4.59E-04 | 4.97E-03         | -1.63   | 12.55          | TGFB1;CCND1;RAC1;TNF                                                |
| Amoebiasis_Homo sapiens_hsa05146                                           | 4/100   | 4.42E-04 | 4.97E-03         | -1.48   | 11.44          | SERPINB1;TGFB1;ADCY1;TNF                                            |
| Chemokine signaling pathway_Homo sapiens_hsa04062                          | 5/187   | 5.35E-04 | 5.45E-03         | -1.51   | 11.40          | GNGT1;GNB1;ADCY2;ADCY1;RAC1                                         |

**Supplementary Table S4: Output table from Enricher of enriched KEGG pathways from IPA analysis of CNV-disrupted genes with high brain expression in European cases.**

| Term                                                        | Overlap | P-value | Adjusted P-value | Z-score | Combined Score | Genes                              |
|-------------------------------------------------------------|---------|---------|------------------|---------|----------------|------------------------------------|
| GTPase activity, coupled (GO:0061745)                       | 6/151   | 1.6E-05 | 3.8E-03          | -2.57   | 28.38          | EEF1A1;GNGT1;RAB3C;SAR1B;GNB1;RAC1 |
| GTPase activity (GO:0003924)                                | 6/157   | 2.0E-05 | 3.8E-03          | -2.61   | 28.23          | EEF1A1;GNGT1;RAB3C;SAR1B;GNB1;RAC1 |
| GTPase motor activity (GO:0061791)                          | 6/169   | 3.0E-05 | 3.8E-03          | -2.57   | 26.79          | EEF1A1;GNGT1;RAB3C;SAR1B;GNB1;RAC1 |
| Rho guanyl-nucleotide exchange factor activity (GO:0005089) | 4/52    | 3.5E-05 | 3.8E-03          | -1.96   | 20.11          | PLEKHG2;MCF2L;MCF2;ARHGEF4         |
| Rac guanyl-nucleotide exchange factor activity (GO:0030676) | 4/56    | 4.7E-05 | 4.1E-03          | -2.05   | 20.49          | PLEKHG2;MCF2L;MCF2;ARHGEF4         |
| PDZ domain binding (GO:0030165)                             | 4/62    | 7.0E-05 | 5.0E-03          | -2.04   | 19.57          | PRKN;KCNJ4;GRID2;PSEN1             |

**Supplementary Table S5: Output table from Enricher of enriched GO Molecular Functions from IPA analysis of CNV-disrupted genes with high brain expression in European cases.**



| Term                                                                                                   | Overlap | P-value  | Adjusted P-value | Z-score | Combined Score | Genes                                                                |
|--------------------------------------------------------------------------------------------------------|---------|----------|------------------|---------|----------------|----------------------------------------------------------------------|
| positive regulation of apoptotic process (GO:0043065)                                                  | 12/374  | 7.28E-09 | 9.95E-06         | -4.87   | 91.24          | NTRK1;BMP2;TGFB1;APH1B;PLEKHG2;MCF2;MCF2L;ARHGEF4;FYN;RAC1;HMGB1;TNF |
| canonical Wnt signaling pathway involved in positive regulation of apoptotic process (GO:0044337)      | 11/279  | 3.90E-09 | 9.95E-06         | -4.36   | 84.39          | BMP2;APH1B;PLEKHG2;MYC;MCF2;MCF2L;ARHGEF4;RAC1;PSEN1;HMGB1;TNF       |
| positive regulation of cysteine-type endopeptidase activity involved in apoptotic process (GO:0043280) | 10/258  | 2.48E-08 | 2.26E-05         | -4.13   | 72.31          | BMP2;APH1B;PLEKHG2;MYC;MCF2;MCF2L;ARHGEF4;RAC1;HMGB1;TNF             |
| positive regulation of neuron apoptotic process (GO:0043525)                                           | 10/270  | 3.81E-08 | 2.60E-05         | -4.25   | 72.68          | BMP2;GRID2;APH1B;PLEKHG2;MCF2;MCF2L;ARHGEF4;RAC1;HMGB1;TNF           |
| positive regulation of leukocyte apoptotic process (GO:2000108)                                        | 9/234   | 1.40E-07 | 2.64E-05         | -3.97   | 62.61          | BMP2;APH1B;PLEKHG2;MCF2;MCF2L;ARHGEF4;RAC1;HMGB1;TNF                 |
| positive regulation of fat cell apoptotic process (GO:1904651)                                         | 9/234   | 1.40E-07 | 2.64E-05         | -3.97   | 62.60          | BMP2;APH1B;PLEKHG2;MCF2;MCF2L;ARHGEF4;RAC1;HMGB1;TNF                 |
| positive regulation of myofibroblast cell apoptotic process (GO:1904522)                               | 9/234   | 1.40E-07 | 2.64E-05         | -3.96   | 62.58          | BMP2;APH1B;PLEKHG2;MCF2;MCF2L;ARHGEF4;RAC1;HMGB1;TNF                 |
| positive regulation of muscle cell apoptotic process (GO:0010661)                                      | 9/234   | 1.40E-07 | 2.64E-05         | -3.96   | 62.50          | BMP2;APH1B;PLEKHG2;MCF2;MCF2L;ARHGEF4;RAC1;HMGB1;TNF                 |
| positive regulation of epithelial cell apoptotic process (GO:1904037)                                  | 9/234   | 1.40E-07 | 2.64E-05         | -3.96   | 62.50          | BMP2;APH1B;PLEKHG2;MCF2;MCF2L;ARHGEF4;RAC1;HMGB1;TNF                 |
| positive regulation of myeloid cell apoptotic process (GO:0033034)                                     | 9/235   | 1.45E-07 | 2.64E-05         | -3.96   | 62.42          | BMP2;APH1B;PLEKHG2;MCF2;MCF2L;ARHGEF4;RAC1;HMGB1;TNF                 |
| positive regulation of glial cell apoptotic process (GO:0034352)                                       | 9/234   | 1.40E-07 | 2.64E-05         | -3.95   | 62.42          | BMP2;APH1B;PLEKHG2;MCF2;MCF2L;ARHGEF4;RAC1;HMGB1;TNF                 |
| positive regulation of mesenchymal cell apoptotic process (GO:2001055)                                 | 9/234   | 1.40E-07 | 2.64E-05         | -3.95   | 62.41          | BMP2;APH1B;PLEKHG2;MCF2;MCF2L;ARHGEF4;RAC1;HMGB1;TNF                 |
| positive regulation of apoptotic process involved in development (GO:1904747)                          | 9/234   | 1.40E-07 | 2.64E-05         | -3.95   | 62.37          | BMP2;APH1B;PLEKHG2;MCF2;MCF2L;ARHGEF4;RAC1;HMGB1;TNF                 |
| positive regulation of apoptotic process in other organism (GO:0044533)                                | 9/234   | 1.40E-07 | 2.64E-05         | -3.95   | 62.34          | BMP2;APH1B;PLEKHG2;MCF2;MCF2L;ARHGEF4;RAC1;HMGB1;TNF                 |
| positive regulation of compound eye retinal cell apoptotic process (GO:1901694)                        | 9/234   | 1.40E-07 | 2.64E-05         | -3.95   | 62.31          | BMP2;APH1B;PLEKHG2;MCF2;MCF2L;ARHGEF4;RAC1;HMGB1;TNF                 |
| positive regulation of execution phase of apoptosis (GO:1900119)                                       | 9/241   | 1.79E-07 | 2.72E-05         | -4.03   | 62.62          | BMP2;APH1B;PLEKHG2;MCF2;MCF2L;ARHGEF4;RAC1;HMGB1;TNF                 |
| positive regulation of anoikis (GO:2000210)                                                            | 9/240   | 1.73E-07 | 2.72E-05         | -3.98   | 62.01          | BMP2;APH1B;PLEKHG2;MCF2;MCF2L;ARHGEF4;RAC1;HMGB1;TNF                 |
| positive regulation of fibroblast apoptotic process (GO:2000271)                                       | 9/238   | 1.61E-07 | 2.72E-05         | -3.94   | 61.69          | BMP2;APH1B;PLEKHG2;MCF2;MCF2L;ARHGEF4;RAC1;HMGB1;TNF                 |
| positive regulation of apoptotic signaling pathway (GO:2001235)                                        | 9/248   | 2.29E-07 | 3.29E-05         | -4.09   | 62.51          | BMP2;APH1B;PLEKHG2;MCF2;MCF2L;ARHGEF4;RAC1;HMGB1;TNF                 |
| cellular response to forskolin (GO:1904322)                                                            | 4/19    | 5.43E-07 | 7.41E-05         | -3.42   | 49.30          | TGFB1;ADCY2;ADCY1;TNF                                                |
| Notch receptor processing, ligand-dependent (GO:0035333)                                               | 5/59    | 2.11E-06 | 2.74E-04         | -2.57   | 33.62          | BMP2;TGFB1;APH1B;MYC;PSEN1                                           |
| positive regulation of I-kappaB phosphorylation (GO:1903721)                                           | 8/252   | 3.05E-06 | 3.47E-04         | -4.03   | 51.22          | PRKN;NTRK1;BMP2;TGFB1;CCND1;PLK2;RAC1;TNF                            |
| induction by virus of host protein phosphorylation (GO:0039614)                                        | 6/113   | 3.02E-06 | 3.47E-04         | -2.90   | 36.80          | NTRK1;BMP2;TGFB1;CCND1;RAC1;TNF                                      |
| positive regulation of inhibitory G-protein coupled receptor phosphorylation (GO:1904325)              | 6/113   | 3.02E-06 | 3.47E-04         | -2.89   | 36.77          | NTRK1;BMP2;TGFB1;CCND1;RAC1;TNF                                      |
| positive regulation of MAP kinase activity (GO:0043406)                                                | 6/118   | 3.89E-06 | 4.25E-04         | -3.06   | 38.16          | BMP2;TGFB1;FGF18;HMGB1;TNF;ADRA2A                                    |
| positive regulation of histone phosphorylation (GO:0033129)                                            | 6/120   | 4.29E-06 | 4.50E-04         | -2.88   | 35.54          | NTRK1;BMP2;TGFB1;CCND1;RAC1;TNF                                      |
| positive regulation of phosphorylation of RNA polymerase II C-terminal domain (GO:1901409)             | 6/122   | 4.72E-06 | 4.77E-04         | -2.95   | 36.17          | NTRK1;BMP2;TGFB1;CCND1;RAC1;TNF                                      |
| positive regulation of MAPK cascade (GO:0043410)                                                       | 7/194   | 5.71E-06 | 5.57E-04         | -3.41   | 41.19          | NTRK1;BMP2;TGFB1;CCND1;RAC1;HMGB1;TNF                                |
| positive regulation of protein autophosphorylation (GO:0031954)                                        | 6/128   | 6.22E-06 | 5.86E-04         | -3.05   | 36.54          | NTRK1;BMP2;TGFB1;CCND1;RAC1;TNF                                      |
| positive regulation of peptidyl-threonine phosphorylation (GO:0010800)                                 | 6/131   | 7.11E-06 | 6.48E-04         | -3.10   | 36.73          | NTRK1;BMP2;TGFB1;CCND1;RAC1;TNF                                      |
| activation of MAPKK activity (GO:0000186)                                                              | 5/86    | 1.36E-05 | 1.20E-03         | -3.03   | 33.92          | NTRK1;TGFB1;FGF18;TNF;ADRA2A                                         |
| positive regulation of ERK1 and ERK2 cascade via TNFSF11-mediated signaling (GO:0071848)               | 6/151   | 1.60E-05 | 1.33E-03         | -3.28   | 36.26          | NTRK1;BMP2;TGFB1;FGF18;HMGB1;TNF                                     |
| positive regulation of protein phosphorylation (GO:0001934)                                            | 6/151   | 1.60E-05 | 1.33E-03         | -3.26   | 36.03          | NTRK1;BMP2;TGFB1;CCND1;RAC1;TNF                                      |
| positive regulation of pathway-restricted SMAD protein phosphorylation (GO:0010862)                    | 6/155   | 1.86E-05 | 1.49E-03         | -3.21   | 34.94          | NTRK1;BMP2;TGFB1;CCND1;RAC1;TNF                                      |
| positive regulation of peptidyl-serine phosphorylation (GO:0033138)                                    | 6/160   | 2.22E-05 | 1.74E-03         | -3.46   | 37.11          | NTRK1;BMP2;TGFB1;CCND1;RAC1;TNF                                      |
| positive regulation of peptidyl-tyrosine phosphorylation (GO:0050731)                                  | 6/169   | 3.03E-05 | 2.30E-03         | -3.40   | 35.41          | NTRK1;BMP2;TGFB1;CCND1;RAC1;TNF                                      |
| cellular response to catecholamine stimulus (GO:0071870)                                               | 3/18    | 3.37E-05 | 2.49E-03         | -2.96   | 30.49          | TGFB1;GNB1;TNF                                                       |
| positive regulation of protein kinase activity (GO:0045860)                                            | 6/176   | 3.80E-05 | 2.66E-03         | -3.40   | 34.62          | NTRK1;BMP2;TGFB1;CCND1;RAC1;TNF                                      |
| positive regulation of JUN kinase activity (GO:0043507)                                                | 5/106   | 3.75E-05 | 2.66E-03         | -2.87   | 29.22          | TGFB1;FGF18;HMGB1;TNF;ADRA2A                                         |
| cAMP-mediated signaling (GO:0019933)                                                                   | 3/23    | 7.22E-05 | 4.93E-03         | -2.94   | 28.04          | RIMS2;ADCY2;ADCY1                                                    |
| negative regulation of neuron apoptotic process (GO:0043524)                                           | 8/399   | 8.31E-05 | 5.40E-03         | -5.02   | 47.19          | NTRK1;PRKN;GRID2;MYC;PLK2;ASNS;PSEN1;SOD2                            |

**Supplementary Table S6: Output table from Enricher of enriched GO Biological Processes from IPA analysis of CNV-disrupted genes with high brain expression in European cases.**

Table 1

| Term                                                   | Overlap | P-value  | Adjusted P-value | Z-score | Combined Score | Genes                                                                                                                |
|--------------------------------------------------------|---------|----------|------------------|---------|----------------|----------------------------------------------------------------------------------------------------------------------|
| mRNA binding (GO:0003729)                              | 18/1230 | 1.52E-07 | 6.78E-06         | -3.87   | 60.74          | YWHAE;EIF4A2;LRRC59;SF3B2;RFX3;LARP4B;APEH;C14ORF93;GTPBP4;AKAP1;MOV10;S100A16;KYAT3;LUC7L3;RP9;METTL16;SRSF7;FAM50A |
| RNA binding (GO:0003723)                               | 17/1199 | 5.68E-07 | 6.78E-06         | -3.68   | 52.90          | YWHAE;EIF4A2;LRRC59;SF3B2;LARP4B;APEH;C14ORF93;GTPBP4;AKAP1;MOV10;S100A16;KYAT3;LUC7L3;RP9;METTL16;SRSF7;FAM50A      |
| base pairing with RNA (GO:0000498)                     | 17/1199 | 5.68E-07 | 6.78E-06         | -3.67   | 52.81          | YWHAE;EIF4A2;LRRC59;SF3B2;LARP4B;APEH;C14ORF93;GTPBP4;AKAP1;MOV10;S100A16;KYAT3;LUC7L3;RP9;METTL16;SRSF7;FAM50A      |
| N6-methyladenosine-containing RNA binding (GO:1990247) | 17/1199 | 5.68E-07 | 6.78E-06         | -3.67   | 52.73          | YWHAE;EIF4A2;LRRC59;SF3B2;LARP4B;APEH;C14ORF93;GTPBP4;AKAP1;MOV10;S100A16;KYAT3;LUC7L3;RP9;METTL16;SRSF7;FAM50A      |
| pre-mRNA binding (GO:0036002)                          | 17/1200 | 5.75E-07 | 6.78E-06         | -3.67   | 52.68          | YWHAE;EIF4A2;LRRC59;SF3B2;LARP4B;APEH;C14ORF93;GTPBP4;AKAP1;MOV10;S100A16;KYAT3;LUC7L3;RP9;METTL16;SRSF7;FAM50A      |
| 7S RNA binding (GO:0008312)                            | 17/1200 | 5.75E-07 | 6.78E-06         | -3.66   | 52.58          | YWHAE;EIF4A2;LRRC59;SF3B2;LARP4B;APEH;C14ORF93;GTPBP4;AKAP1;MOV10;S100A16;KYAT3;LUC7L3;RP9;METTL16;SRSF7;FAM50A      |
| misfolded RNA binding (GO:0034336)                     | 17/1199 | 5.68E-07 | 6.78E-06         | -3.66   | 52.56          | YWHAE;EIF4A2;LRRC59;SF3B2;LARP4B;APEH;C14ORF93;GTPBP4;AKAP1;MOV10;S100A16;KYAT3;LUC7L3;RP9;METTL16;SRSF7;FAM50A      |
| G-quadruplex RNA binding (GO:0002151)                  | 17/1201 | 5.82E-07 | 6.78E-06         | -3.66   | 52.53          | YWHAE;EIF4A2;LRRC59;SF3B2;LARP4B;APEH;C14ORF93;GTPBP4;AKAP1;MOV10;S100A16;KYAT3;LUC7L3;RP9;METTL16;SRSF7;FAM50A      |
| histone pre-mRNA DCP binding (GO:0071208)              | 17/1200 | 5.75E-07 | 6.78E-06         | -3.65   | 52.50          | YWHAE;EIF4A2;LRRC59;SF3B2;LARP4B;APEH;C14ORF93;GTPBP4;AKAP1;MOV10;S100A16;KYAT3;LUC7L3;RP9;METTL16;SRSF7;FAM50A      |
| alpha-aminoacyl-tRNA binding (GO:1904678)              | 17/1199 | 5.68E-07 | 6.78E-06         | -3.65   | 52.50          | YWHAE;EIF4A2;LRRC59;SF3B2;LARP4B;APEH;C14ORF93;GTPBP4;AKAP1;MOV10;S100A16;KYAT3;LUC7L3;RP9;METTL16;SRSF7;FAM50A      |
| snRNA binding (GO:0017069)                             | 17/1202 | 5.89E-07 | 6.78E-06         | -3.66   | 52.48          | YWHAE;EIF4A2;LRRC59;SF3B2;LARP4B;APEH;C14ORF93;GTPBP4;AKAP1;MOV10;S100A16;KYAT3;LUC7L3;RP9;METTL16;SRSF7;FAM50A      |
| AU-rich element binding (GO:0017091)                   | 17/1203 | 5.95E-07 | 6.78E-06         | -3.66   | 52.42          | YWHAE;EIF4A2;LRRC59;SF3B2;LARP4B;APEH;C14ORF93;GTPBP4;AKAP1;MOV10;S100A16;KYAT3;LUC7L3;RP9;METTL16;SRSF7;FAM50A      |
| miRNA binding (GO:0035198)                             | 17/1203 | 5.95E-07 | 6.78E-06         | -3.65   | 52.38          | YWHAE;EIF4A2;LRRC59;SF3B2;LARP4B;APEH;C14ORF93;GTPBP4;AKAP1;MOV10;S100A16;KYAT3;LUC7L3;RP9;METTL16;SRSF7;FAM50A      |
| 21U-RNA binding (GO:0034583)                           | 17/1199 | 5.68E-07 | 6.78E-06         | -3.64   | 52.37          | YWHAE;EIF4A2;LRRC59;SF3B2;LARP4B;APEH;C14ORF93;GTPBP4;AKAP1;MOV10;S100A16;KYAT3;LUC7L3;RP9;METTL16;SRSF7;FAM50A      |
| pre-miRNA binding (GO:0070883)                         | 17/1201 | 5.82E-07 | 6.78E-06         | -3.65   | 52.37          | YWHAE;EIF4A2;LRRC59;SF3B2;LARP4B;APEH;C14ORF93;GTPBP4;AKAP1;MOV10;S100A16;KYAT3;LUC7L3;RP9;METTL16;SRSF7;FAM50A      |
| telomeric repeat-containing RNA binding (GO:0061752)   | 17/1200 | 5.75E-07 | 6.78E-06         | -3.64   | 52.36          | YWHAE;EIF4A2;LRRC59;SF3B2;LARP4B;APEH;C14ORF93;GTPBP4;AKAP1;MOV10;S100A16;KYAT3;LUC7L3;RP9;METTL16;SRSF7;FAM50A      |
| RNA stem-loop binding (GO:0035613)                     | 17/1200 | 5.75E-07 | 6.78E-06         | -3.64   | 52.30          | YWHAE;EIF4A2;LRRC59;SF3B2;LARP4B;APEH;C14ORF93;GTPBP4;AKAP1;MOV10;S100A16;KYAT3;LUC7L3;RP9;METTL16;SRSF7;FAM50A      |
| GU repeat RNA binding (GO:1990605)                     | 17/1199 | 5.68E-07 | 6.78E-06         | -3.63   | 52.26          | YWHAE;EIF4A2;LRRC59;SF3B2;LARP4B;APEH;C14ORF93;GTPBP4;AKAP1;MOV10;S100A16;KYAT3;LUC7L3;RP9;METTL16;SRSF7;FAM50A      |
| RNA cap binding (GO:0000339)                           | 17/1201 | 5.82E-07 | 6.78E-06         | -3.64   | 52.24          | YWHAE;EIF4A2;LRRC59;SF3B2;LARP4B;APEH;C14ORF93;GTPBP4;AKAP1;MOV10;S100A16;KYAT3;LUC7L3;RP9;METTL16;SRSF7;FAM50A      |
| piRNA binding (GO:0034584)                             | 17/1202 | 5.89E-07 | 6.78E-06         | -3.64   | 52.22          | YWHAE;EIF4A2;LRRC59;SF3B2;LARP4B;APEH;C14ORF93;GTPBP4;AKAP1;MOV10;S100A16;KYAT3;LUC7L3;RP9;METTL16;SRSF7;FAM50A      |
| BRE binding (GO:0042835)                               | 17/1200 | 5.75E-07 | 6.78E-06         | -3.63   | 52.20          | YWHAE;EIF4A2;LRRC59;SF3B2;LARP4B;APEH;C14ORF93;GTPBP4;AKAP1;MOV10;S100A16;KYAT3;LUC7L3;RP9;METTL16;SRSF7;FAM50A      |
| ribonuclease P RNA binding (GO:0033204)                | 17/1199 | 5.68E-07 | 6.78E-06         | -3.63   | 52.20          | YWHAE;EIF4A2;LRRC59;SF3B2;LARP4B;APEH;C14ORF93;GTPBP4;AKAP1;MOV10;S100A16;KYAT3;LUC7L3;RP9;METTL16;SRSF7;FAM50A      |
| telomerase RNA binding (GO:0070034)                    | 17/1205 | 6.09E-07 | 6.78E-06         | -3.64   | 52.15          | YWHAE;EIF4A2;LRRC59;SF3B2;LARP4B;APEH;C14ORF93;GTPBP4;AKAP1;MOV10;S100A16;KYAT3;LUC7L3;RP9;METTL16;SRSF7;FAM50A      |
| snoRNA binding (GO:0030515)                            | 17/1206 | 6.16E-07 | 6.78E-06         | -3.65   | 52.14          | YWHAE;EIF4A2;LRRC59;SF3B2;LARP4B;APEH;C14ORF93;GTPBP4;AKAP1;MOV10;S100A16;KYAT3;LUC7L3;RP9;METTL16;SRSF7;FAM50A      |
| primary miRNA binding (GO:0070878)                     | 17/1204 | 6.02E-07 | 6.78E-06         | -3.64   | 52.13          | YWHAE;EIF4A2;LRRC59;SF3B2;LARP4B;APEH;C14ORF93;GTPBP4;AKAP1;MOV10;S100A16;KYAT3;LUC7L3;RP9;METTL16;SRSF7;FAM50A      |
| regulatory region RNA binding (GO:0001069)             | 17/1199 | 5.68E-07 | 6.78E-06         | -3.62   | 52.10          | YWHAE;EIF4A2;LRRC59;SF3B2;LARP4B;APEH;C14ORF93;GTPBP4;AKAP1;MOV10;S100A16;KYAT3;LUC7L3;RP9;METTL16;SRSF7;FAM50A      |
| rRNA binding (GO:0019843)                              | 17/1205 | 6.09E-07 | 6.78E-06         | -3.64   | 52.04          | YWHAE;EIF4A2;LRRC59;SF3B2;LARP4B;APEH;C14ORF93;GTPBP4;AKAP1;MOV10;S100A16;KYAT3;LUC7L3;RP9;METTL16;SRSF7;FAM50A      |
| siRNA binding (GO:0035197)                             | 17/1203 | 5.95E-07 | 6.78E-06         | -3.63   | 52.04          | YWHAE;EIF4A2;LRRC59;SF3B2;LARP4B;APEH;C14ORF93;GTPBP4;AKAP1;MOV10;S100A16;KYAT3;LUC7L3;RP9;METTL16;SRSF7;FAM50A      |
| translation factor activity, RNA binding (GO:0008135)  | 17/1210 | 6.46E-07 | 6.86E-06         | -3.65   | 52.06          | YWHAE;EIF4A2;LRRC59;SF3B2;LARP4B;APEH;C14ORF93;GTPBP4;AKAP1;MOV10;S100A16;KYAT3;LUC7L3;RP9;METTL16;SRSF7;FAM50A      |
| single-stranded RNA binding (GO:0003727)               | 17/1216 | 6.92E-07 | 7.10E-06         | -3.66   | 51.88          | YWHAE;EIF4A2;LRRC59;SF3B2;LARP4B;APEH;C14ORF93;GTPBP4;AKAP1;MOV10;S100A16;KYAT3;LUC7L3;RP9;METTL16;SRSF7;FAM50A      |
| tRNA binding (GO:0000049)                              | 17/1219 | 7.16E-07 | 7.11E-06         | -3.65   | 51.62          | YWHAE;EIF4A2;LRRC59;SF3B2;LARP4B;APEH;C14ORF93;GTPBP4;AKAP1;MOV10;S100A16;KYAT3;LUC7L3;RP9;METTL16;SRSF7;FAM50A      |
| double-stranded RNA binding (GO:0003725)               | 17/1223 | 7.49E-07 | 7.21E-06         | -3.62   | 51.04          | YWHAE;EIF4A2;LRRC59;SF3B2;LARP4B;APEH;C14ORF93;GTPBP4;AKAP1;MOV10;S100A16;KYAT3;LUC7L3;RP9;METTL16;SRSF7;FAM50A      |
| death receptor binding (GO:0005123)                    | 2/14    | 1.07E-03 | 9.98E-03         | -1.03   | 7.07           | TMBIM1;TNFSF11                                                                                                       |

Supplementary Table S7: Output table from Enricher of enriched GO Molecular Functions from IPA analysis of CNV-disrupted genes with high brain expression in European controls.

## REFERENCES

1. van Rheenen W, Shatunov A, Dekker AM, McLaughlin RL, Diekstra FP, Pulit SL, van der Spek RA, Vosa U, de Jong S, Robinson MR, Yang J, Fogh I, van Doormaal PT, Tazelaar GH, Koppers M, Blokhuis AM, Sproviero W, Jones AR, Kenna KP, van Eijk KR, Harschnitz O, Schellevis RD, Brands WJ, Medic J, Menelaou A, Vajda A, Ticozzi N, Lin K, Rogelj B, Vrabec K, Ravnik-Glavac M, Koritnik B, Zidar J, Leonardis L, Groselj LD, Millecamps S, Salachas F, Meininger V, de Carvalho M, Pinto S, Mora JS, Rojas-Garcia R, Polak M, Chandran S, Colville S, Swingler R, Morrison KE, Shaw PJ, Hardy J, Orrell RW, Pittman A, Sidle K, Fratta P, Malaspina A, Topp S, Petri S, Abdulla S, Drepper C, Sendtner M, Meyer T, Ophoff RA, Staats KA, Wiedau-Pazos M, Lomen-Hoerth C, Van Deerlin VM, Trojanowski JQ, Elman L, McCluskey L, Basak AN, Tunca C, Hamzeiy H, Parman Y, Meitinger T, Lichtner P, Radivojkov-Blagojevic M, Andres CR, Maurel C, Bensimon G, Landwehrmeyer B, Brice A, Payan CA, Saker-Delye S, Durr A, Wood NW, Tittmann L, Lieb W, Franke A, Rietschel M, Cichon S, Nothen MM, Amouyel P, Tzourio C, Dartigues JF, Uitterlinden AG, Rivadeneira F, Estrada K, Hofman A, Curtis C, Blauw HM, van der Kooij AJ, de Visser M, Goris A, Weber M, Shaw CE, Smith BN, Pansarasa O, Cereda C, Del Bo R, Comi GP, D'Alfonso S, Bertolin C, Soraru G, Mazzini L, Pensato V, Gellera C, Tiloca C, Ratti A, Calvo A, Moglia C, Brunetti M, Arcuti S, Capozzo R, Zecca C, Lunetta C, Penco S, Riva N, Padovani A, Filosto M, Muller B, Stuit RJ, Registry P, Group S, Registry S, Consortium FS, Consortium S, Group NS, Blair I, Zhang K, McCann EP, Fifita JA, Nicholson GA, Rowe DB, Pamphlett R, Kiernan MC, Grosskreutz J, Witte OW, Ringer T, Prell T, Stubendorff B, Kurth I, Hubner CA, Leigh PN, Casale F, Chio A, Beghi E, Pupillo E, Tortelli R, Logroscino G, Powell J, Ludolph AC, Weishaupt JH, Robberecht W, Van Damme P, Franke L, Pers TH, Brown RH, Glass JD, Landers JE, Hardiman O, Andersen PM, Corcia P, Vourc'h P, Silani V, Wray NR, Visscher PM, de Bakker PI, van Es MA, Pasterkamp RJ, Lewis CM, Breen G, Al-Chalabi A, van den Berg LH, Veldink JH. Genome-wide association analyses identify new risk variants and the genetic architecture of amyotrophic lateral sclerosis. *Nat Genet* 2016;48(9):1043-8. doi: 10.1038/ng.3622 [published Online First: 2016/07/28]
2. Addis L, Rosch RE, Valentin A, Makoff A, Robinson R, Everett KV, Nashef L, Pal DK. Analysis of rare copy number variation in absence epilepsies. *Neurology Genetics* 2016;2(2):e56. doi: 10.1212/NXG.0000000000000056
3. Paciorkowski AR, Thio LL, Rosenfeld JA, GajECKA M, Gurnett CA, Kulkarni S, Chung WK, Marsh ED, Gentile M, Reggin JD, Wheless JW, Balasubramanian S, Kumar R, Christian SL, Marini C, Guerrini R, Maltsev N, Shaffer LG, Dobyns WB. Copy number variants and infantile spasms: evidence for abnormalities in ventral forebrain development and pathways of synaptic function. *Eur J Hum Genet* 2011;19(12):1238-45. doi: [ejhg2011121 \[pii\] 10.1038/ejhg.2011.121](https://doi.org/10.1038/ejhg.2011.121) [published Online First: 2011/06/23]
4. Mefford HC, Sharp AJ, Baker C, Itsara A, Jiang Z, Buysse K, Huang S, Maloney VK, Crolla JA, Baralle D, Collins A, Mercer C, Norga K, de Ravel T, Devriendt K, Bongers EM, de Leeuw N, Reardon W, Gimelli S, Bena F, Hennekam RC, Male A, Gaunt L, Clayton-Smith J, Simoncic I, Park SM, Mehta SG, Nik-Zainal S, Woods CG, Firth HV, Parkin G, Fichera M, Reitano S, Lo Giudice M, Li KE, Casuga I, Broomer A, Conrad B, Schwerzmann M, Raber L, Gallati S, Striano P, Coppola A, Tolmie JL, Tobias ES, Lilley C, Armengol L, Spyschaert Y, Verloo P, De Coene A, Goossens L, Mortier G, Speleman F, van Binsbergen E, Nelen MR, Hochstenbach R, Poot M, Gallagher L, Gill M, McClellan J, King MC, Regan R, Skinner C, Stevenson RE, Antonarakis SE, Chen C, Estivill X, Menten B, Gimelli G, Gribble S, Schwartz S, Sutcliffe JS, Walsh T, Knight SJ, Sebat J, Romano C, Schwartz CE, Veltman JA, de Vries BB, Vermeesch JR, Barber JC, Willatt L, Tassabehji M, Eichler EE. Recurrent rearrangements of chromosome 1q21.1 and variable pediatric phenotypes. *N Engl J Med* 2008;359(16):1685-99. doi: [NEJMoa0805384 \[pii\] 10.1056/NEJMoa0805384](https://doi.org/10.1056/NEJMoa0805384) [published Online First: 2008/09/12]
5. Rosenfeld JA, Traylor RN, Schaefer GB, McPherson EW, Ballif BC, Klopocki E, Mundlos S, Shaffer LG, Aylsworth AS. Proximal microdeletions and microduplications of 1q21.1 contribute to variable abnormal phenotypes. *Eur J Hum Genet* 2012;20(7):754-61. doi: [ejhg20126 \[pii\] 10.1038/ejhg.2012.6](https://doi.org/10.1038/ejhg.2012.6) [published Online First: 2012/02/10]

6. Dharmadhikari AV, Kang SH, Szafranski P, Person RE, Sampath S, Prakash SK, Bader PI, Phillips JA, 3rd, Hannig V, Williams M, Vinson SS, Wilfong AA, Reimschisel TE, Craigen WJ, Patel A, Bi W, Lupski JR, Belmont J, Cheung SW, Stankiewicz P. Small rare recurrent deletions and reciprocal duplications in 2q21.1, including brain-specific ARHGEF4 and GPR148. *Hum Mol Genet* 2012;21(15):3345-55. doi: [dds166 \[pii\] 10.1093/hmg/dds166](https://doi.org/10.1093/hmg/dds166) [published Online First: 2012/05/01]
7. Kousi M, Anttila V, Schulz A, Calafato S, Jakkula E, Riesch E, Myllykangas L, Kalimo H, Topcu M, Gokben S, Alehan F, Lemke JR, Alber M, Palotie A, Kopra O, Lehesjoki AE. Novel mutations consolidate KCTD7 as a progressive myoclonus epilepsy gene. *J Med Genet* 2012;49(6):391-9. doi: [jmedgenet-2012-100859 \[pii\] 10.1136/jmedgenet-2012-100859](https://doi.org/10.1136/jmedgenet-2012-100859) [published Online First: 2012/06/14]
8. Carvill GL, Regan BM, Yendle SC, O'Roak BJ, Lozovaya N, Bruneau N, Burnashev N, Khan A, Cook J, Geraghty E, Sadleir LG, Turner SJ, Tsai MH, Webster R, Ouvrier R, Damiano JA, Berkovic SF, Shendure J, Hildebrand MS, Szepietowski P, Scheffer IE, Mefford HC. GRIN2A mutations cause epilepsy-aphasia spectrum disorders. *Nat Genet* 2013;45(9):1073-6. doi: [ng.2727 \[pii\] 10.1038/ng.2727](https://doi.org/10.1038/ng.2727) [published Online First: 2013/08/13]
9. Lemke JR, Lal D, Reinthaler EM, Steiner I, Nothnagel M, Alber M, Geider K, Laube B, Schwake M, Finsterwalder K, Franke A, Schilhabel M, Jahn JA, Muhle H, Boor R, Van Paesschen W, Caraballo R, Fejerman N, Weckhuysen S, De Jonghe P, Larsen J, Moller RS, Hjalgrim H, Addis L, Tang S, Hughes E, Pal DK, Veri K, Vaher U, Talvik T, Dimova P, Guerrero Lopez R, Serratosa JM, Linnankivi T, Lehesjoki AE, Ruf S, Wolff M, Buerki S, Wohlrab G, Kroell J, Datta AN, Fiedler B, Kurlemann G, Kluger G, Hahn A, Haberlandt DE, Kutzer C, Sperner J, Becker F, Weber YG, Feucht M, Steinbock H, Neophythou B, Ronen GM, Gruber-Sedlmayr U, Geldner J, Harvey RJ, Hoffmann P, Herms S, Altmuller J, Toliat MR, Thiele H, Nurnberg P, Wilhelm C, Stephani U, Helbig I, Lerche H, Zimprich F, Neubauer BA, Biskup S, von Spiczak S. Mutations in GRIN2A cause idiopathic focal epilepsy with rolandic spikes. *Nat Genet* 2013;45(9):1067-72. doi: [ng.2728 \[pii\] 10.1038/ng.2728](https://doi.org/10.1038/ng.2728) [published Online First: 2013/08/13]
10. Lesca G, Rudolf G, Bruneau N, Lozovaya N, Labalme A, Boutry-Kryza N, Salmi M, Tsintsadze T, Addis L, Motte J, Wright S, Tsintsadze V, Michel A, Doummar D, Lascelles K, Strug L, Waters P, de Bellescize J, Vrielyncq P, de Saint Martin A, Ville D, Rylvlin P, Arzimanoglou A, Hirsch E, Vincent A, Pal D, Burnashev N, Sanlaville D, Szepietowski P. GRIN2A mutations in acquired epileptic aphasia and related childhood focal epilepsies and encephalopathies with speech and language dysfunction. *Nat Genet* 2013;45(9):1061-6. doi: [ng.2726 \[pii\] 10.1038/ng.2726](https://doi.org/10.1038/ng.2726) [published Online First: 2013/08/13]
11. de Kovel CG, Trucks H, Helbig I, Mefford HC, Baker C, Leu C, Kluck C, Muhle H, von Spiczak S, Ostertag P, Obermeier T, Kleefuss-Lie AA, Hallmann K, Steffens M, Gaus V, Klein KM, Hamer HM, Rosenow F, Brilstra EH, Trenite DK, Swinkels ME, Weber YG, Unterberger I, Zimprich F, Urak L, Feucht M, Fuchs K, Moller RS, Hjalgrim H, De Jonghe P, Suls A, Ruckert IM, Wichmann HE, Franke A, Schreiber S, Nurnberg P, Elger CE, Lerche H, Stephani U, Koeleman BP, Lindhout D, Eichler EE, Sander T. Recurrent microdeletions at 15q11.2 and 16p13.11 predispose to idiopathic generalized epilepsies. *Brain* 2010;133(Pt 1):23-32. doi: [awp262 \[pii\] 10.1093/brain/awp262](https://doi.org/10.1093/brain/awp262) [published Online First: 2009/10/22]
12. Heinzen EL, Radtke RA, Urban TJ, Cavalleri GL, Depondt C, Need AC, Walley NM, Nicoletti P, Ge D, Catarino CB, Duncan JS, Kasperaviciute D, Tate SK, Caboclo LO, Sander JW, Clayton L, Linney KN, Shianna KV, Gumbs CE, Smith J, Cronin KD, Maia JM, Doherty CP, Pandolfo M, Leppert D, Middleton LT, Gibson RA, Johnson MR, Matthews PM, Hosford D, Kalviainen R, Eriksson K, Kantanen AM, Dorn T, Hansen J, Kramer G, Steinhoff BJ, Wieser HG, Zumsteg D, Ortega M, Wood NW, Huxley-Jones J, Mikati M, Gallentine WB, Husain AM, Buckley PG, Stallings RL, Podgoreanu MV, Delanty N, Sisodiya SM, Goldstein DB. Rare deletions at 16p13.11 predispose to a diverse spectrum of sporadic epilepsy syndromes. *Am J Hum Genet* 2010;86(5):707-18. doi: [S0002-9297\(10\)00163-1 \[pii\] 10.1016/j.ajhg.2010.03.018](https://doi.org/10.1016/j.ajhg.2010.03.018) [published Online First: 2010/04/20]
13. Mefford HC, Muhle H, Ostertag P, von Spiczak S, Buysse K, Baker C, Franke A, Malafosse A, Genton P, Thomas P, Gurnett CA, Schreiber S, Bassuk AG, Guipponi M, Stephani U, Helbig I, Eichler EE. Genome-wide copy number variation in epilepsy: novel susceptibility loci in idiopathic generalized and focal epilepsies. *PLoS Genet* 2010;6(5):e1000962. doi: [10.1371/journal.pgen.1000962](https://doi.org/10.1371/journal.pgen.1000962) [published Online First: 2010/05/27]

14. Veeramah KR, Johnstone L, Karafet TM, Wolf D, Sprissler R, Salogiannis J, Barth-Marion A, Greenberg ME, Stuhlmann T, Weinert S, Jentsch TJ, Pazzi M, Restifo LL, Talwar D, Erickson RP, Hammer MF. Exome sequencing reveals new causal mutations in children with epileptic encephalopathies. *Epilepsia* 2013;54(7):1270-81. doi: [10.1111/epi.12201](https://doi.org/10.1111/epi.12201) [published Online First: 2013/05/08]
15. Olson H, Shen Y, Avallone J, Sheidley BR, Pinsky R, Bergin AM, Berry GT, Duffy FH, Eksioglu Y, Harris DJ, Hisama FM, Ho E, Irons M, Jacobsen CM, James P, Kothare S, Khwaja O, Lipton J, Loddenkemper T, Markowitz J, Maski K, Megerian JT, Neilan E, Raffalli PC, Robbins M, Roberts A, Roe E, Rollins C, Sahin M, Sarco D, Schonwald A, Smith SE, Soul J, Stoler JM, Takeoka M, Tan WH, Torres AR, Tsai P, Urion DK, Weissman L, Wolff R, Wu BL, Miller DT, Poduri A. Copy number variation plays an important role in clinical epilepsy. *Ann Neurol* 2014;75(6):943-58. doi: [10.1002/ana.24178](https://doi.org/10.1002/ana.24178) [published Online First: 2014/05/09]
16. Reinthaler EM, Lal D, Lebon S, Hildebrand MS, Dahl HH, Regan BM, Feucht M, Steinbock H, Neophytou B, Ronen GM, Roche L, Gruber-Sedlmayr U, Geldner J, Haberlandt E, Hoffmann P, Herms S, Gieger C, Waldenberger M, Franke A, Wittig M, Schoch S, Becker AJ, Hahn A, Mannik K, Toliat MR, Winterer G, Lerche H, Nurnberg P, Mefford H, Scheffer IE, Berkovic SF, Beckmann JS, Sander T, Jacquemont S, Raymond A, Zimprich F, Neubauer BA. 16p11.2 600 kb Duplications confer risk for typical and atypical Rolandic epilepsy. *Hum Mol Genet* 2014;23(22):6069-80. doi: [ddu306 \[pii\] 10.1093/hmg/ddu306](https://doi.org/10.1093/hmg/ddu306) [published Online First: 2014/06/19]
17. Shaw-Smith C, Redon R, Rickman L, Rio M, Willatt L, Fiegler H, Firth H, Sanlaville D, Winter R, Colleaux L, Bobrow M, Carter NP. Microarray based comparative genomic hybridisation (array-CGH) detects submicroscopic chromosomal deletions and duplications in patients with learning disability/mental retardation and dysmorphic features. *J Med Genet* 2004;41(4):241-8. [published Online First: 2004/04/03]
18. Esplin ED, Li B, Slavotinek A, Novelli A, Battaglia A, Clark R, Curry C, Hudgins L. Nine patients with Xp22.31 microduplication, cognitive deficits, seizures, and talipes anomalies. *Am J Med Genet A* 2014;164A(8):2097-103. doi: [10.1002/ajmg.a.36598](https://doi.org/10.1002/ajmg.a.36598) [published Online First: 2014/05/08]
19. Li F, Shen Y, Kohler U, Sharkey FH, Menon D, Coulleaux L, Malan V, Rio M, McMullan DJ, Cox H, Fagan KA, Gaunt L, Metcalfe K, Heinrich U, Hislop G, Maye U, Sutcliffe M, Wu BL, Thiel BD, Mulchandani S, Conlin LK, Spinner NB, Murphy KM, Batista DA. Interstitial microduplication of Xp22.31: Causative of intellectual disability or benign copy number variant? *Eur J Med Genet* 2010;53(2):93-9. doi: [S1769-7212\(10\)00007-8 \[pii\] 10.1016/j.ejmg.2010.01.004](https://doi.org/10.1016/j.ejmg.2010.01.004) [published Online First: 2010/02/06]
20. Gohlke BC, Haug K, Fukami M, Friedl W, Noeker M, Rappold GA, Haverkamp F. Interstitial deletion in Xp22.3 is associated with X linked ichthyosis, mental retardation, and epilepsy. *J Med Genet* 2000;37(8):600-2. [published Online First: 2000/08/03]
21. Tyson C, Harvard C, Locker R, Friedman JM, Langlois S, Lewis ME, Van Allen M, Somerville M, Arbour L, Clarke L, McGilivray B, Yong SL, Siegel-Bartel J, Rajcan-Separovic E. Submicroscopic deletions and duplications in individuals with intellectual disability detected by array-CGH. *Am J Med Genet A* 2005;139(3):173-85. doi: [10.1002/ajmg.a.31015](https://doi.org/10.1002/ajmg.a.31015) [published Online First: 2005/11/12]
22. Emsley HC, Appleton RE, Whitmore CL, Jury F, Lamb JA, Martin JE, Ollier WE, de la Morandiere KP, Southern KW, Allan SM. Variations in inflammation-related genes may be associated with childhood febrile seizure susceptibility. *Seizure* 2014;23(6):457-61. doi: [S1059-1311\(14\)00072-7 \[pii\] 10.1016/j.seizure.2014.03.006](https://doi.org/10.1016/j.seizure.2014.03.006) [published Online First: 2014/04/08]
23. Stessman HA, Xiong B, Coe BP, Wang T, Hoekzema K, Fenckova M, Kvarnung M, Gerds J, Trinh S, Cosemans N, Vives L, Lin J, Turner TN, Santen G, Ruivenkamp C, Kriek M, van Haeringen A, Aten E, Friend K, Liebelt J, Barnett C, Haan E, Shaw M, Gecz J, Anderlid BM, Nordgren A, Lindstrand A, Schwartz C, Kooy RF, Vandeweyer G, Helsmoortel C, Romano C, Alberti A, Vinci M, Avola E, Giusto S, Courchesne E, Pramparo T, Pierce K, Nalabolu S, Amaral DG, Scheffer IE, Delatycki MB, Lockhart PJ, Hormozdiari F, Harich B, Castells-Nobau A, Xia K, Peeters H, Nordenskjold M, Schenck A, Bernier RA, Eichler EE. Targeted sequencing identifies 91 neurodevelopmental-disorder risk genes with autism and developmental-disability biases. *Nat Genet* 2017;49(4):515-26. doi: [10.1038/ng.3792](https://doi.org/10.1038/ng.3792) [published Online First: 2017/02/14]

24. Chu TT, Liu Y. An integrated genomic analysis of gene-function correlation on schizophrenia susceptibility genes. *J Hum Genet* 2010;55(5):285-92. doi: [jhg201024](https://doi.org/10.1038/jhg.2010.24) [pii] [10.1038/jhg.2010.24](https://doi.org/10.1038/jhg.2010.24) [published Online First: 2010/03/27]
25. Backx L, Ceulemans B, Vermeesch JR, Devriendt K, Van Esch H. Early myoclonic encephalopathy caused by a disruption of the neuregulin-1 receptor ErbB4. *Eur J Hum Genet* 2009;17(3):378-82. doi: [ejhg2008180](https://doi.org/10.1038/ejhg.2008.180) [pii] [10.1038/ejhg.2008.180](https://doi.org/10.1038/ejhg.2008.180) [published Online First: 2008/10/16]
26. Li KX, Lu YM, Xu ZH, Zhang J, Zhu JM, Zhang JM, Cao SX, Chen XJ, Chen Z, Luo JH, Duan S, Li XM. Neuregulin 1 regulates excitability of fast-spiking neurons through Kv1.1 and acts in epilepsy. *Nat Neurosci* 2011;15(2):267-73. doi: [10.1038/nn.3006](https://doi.org/10.1038/nn.3006) [published Online First: 2011/12/14]
27. Weissflog L, Scholz CJ, Jacob CP, Nguyen TT, Zamzow K, Gross-Lesch S, Renner TJ, Romanos M, Rujescu D, Walitza S, Kneitz S, Lesch KP, Reif A. KCNIP4 as a candidate gene for personality disorders and adult ADHD. *Eur Neuropsychopharmacol* 2013;23(6):436-47. doi: [S0924-977X\(12\)00214-3](https://doi.org/10.1016/j.euroneuro.2012.07.017) [pii] [10.1016/j.euroneuro.2012.07.017](https://doi.org/10.1016/j.euroneuro.2012.07.017) [published Online First: 2012/09/18]
28. Hills LB, Masri A, Konno K, Kakegawa W, Lam AT, Lim-Melia E, Chandy N, Hill RS, Partlow JN, Al-Saffar M, Nasir R, Stoler JM, Barkovich AJ, Watanabe M, Yuzaki M, Mochida GH. Deletions in GRID2 lead to a recessive syndrome of cerebellar ataxia and tonic upgaze in humans. *Neurology* 2013;81(16):1378-86. doi: [WNL.0b013e3182a841a3](https://doi.org/10.1212/WNL.0b013e3182a841a3) [pii] [10.1212/WNL.0b013e3182a841a3](https://doi.org/10.1212/WNL.0b013e3182a841a3) [published Online First: 2013/10/01]
29. Seeburg DP, Pak D, Sheng M. Polo-like kinases in the nervous system. *Oncogene* 2005;24(2):292-8. doi: [1208277](https://doi.org/10.1038/sj.onc.1208277) [pii] [10.1038/sj.onc.1208277](https://doi.org/10.1038/sj.onc.1208277) [published Online First: 2005/01/11]
30. Sun H, Kosaras B, Klein PM, Jensen FE. Mammalian target of rapamycin complex 1 activation negatively regulates Polo-like kinase 2-mediated homeostatic compensation following neonatal seizures. *Proc Natl Acad Sci U S A* 2013;110(13):5199-204. doi: [10.1073/pnas.1208010110](https://doi.org/10.1073/pnas.1208010110) [published Online First: 2013/03/13]
31. Teoh JJ, Iwano T, Kunii M, Atik N, Avriyanti E, Yoshimura SI, Moriwaki K, Harada A. BIG1 is required for the survival of deep layer neurons, neuronal polarity, and the formation of axonal tracts between the thalamus and neocortex in developing brain. *PLoS One* 2017;12(4):e0175888. doi: [10.1371/journal.pone.0175888](https://doi.org/10.1371/journal.pone.0175888) [published Online First: 2017/04/18]
32. Euro E-RESC, Epilepsy Phenome/Genome P, Epi KC. De novo mutations in synaptic transmission genes including DNM1 cause epileptic encephalopathies. *Am J Hum Genet* 2014;95(4):360-70. doi: [10.1016/j.ajhg.2014.08.013](https://doi.org/10.1016/j.ajhg.2014.08.013) [published Online First: 2014/09/30]
33. Lesca G, Rudolf G, Labalme A, Hirsch E, Arzimanoglou A, Genton P, Motte J, de Saint Martin A, Valenti MP, Boulay C, De Bellescize J, Keo-Kosal P, Boutry-Kryza N, Edery P, Sanlaville D, Szepietowski P. Epileptic encephalopathies of the Landau-Kleffner and continuous spike and waves during slow-wave sleep types: Genomic dissection makes the link with autism. *Epilepsia* 2012;53(9):1526-38. doi: [10.1111/j.1528-1167.2012.03559.x](https://doi.org/10.1111/j.1528-1167.2012.03559.x) [published Online First: 2012/06/29]
34. Bacchelli E, Ceroni F, Pinto D, Lomartire S, Giannandrea M, D'Adamo P, Bonora E, Parchi P, Tancredi R, Battaglia A, Maestrini E. A CTNNA3 compound heterozygous deletion implicates a role for alphaT-catenin in susceptibility to autism spectrum disorder. *J Neurodev Disord* 2014;6(1):17. doi: [10.1186/1866-1955-6-17](https://doi.org/10.1186/1866-1955-6-17) [pii] [published Online First: 2014/07/23]
35. Meier S, Strohmaier J, Breuer R, Mattheisen M, Degenhardt F, Muhleisen TW, Schulze TG, Nothen MM, Cichon S, Rietschel M, Wust S. Neuregulin 3 is associated with attention deficits in schizophrenia and bipolar disorder. *Int J Neuropsychopharmacol* 2013;16(3):549-56. doi: [S1461145712000697](https://doi.org/10.1017/S1461145712000697) [pii] [10.1017/S1461145712000697](https://doi.org/10.1017/S1461145712000697) [published Online First: 2012/07/27]
36. Reggiani C, Coppens S, Sekhara T, Dimov I, Pichon B, Lufin N, Addor MC, Belligni EF, Digilio MC, Faletra F, Ferrero GB, Gerard M, Isidor B, Joss S, Niel-Butschi F, Perrone MD, Petit F, Renieri A, Romana S, Topa A, Vermeesch JR, Lenaerts T, Casimir G, Abramowicz M, Bontempi G, Vilain C, Deconinck N, Smits G. Novel promoters and coding first exons in DLG2 linked to developmental disorders and intellectual disability. *Genome Med* 2017;9(1):67. doi: [10.1186/s13073-017-0452-y](https://doi.org/10.1186/s13073-017-0452-y) [published Online First: 2017/07/21]
37. Mejias R, Adamczyk A, Anggono V, Niranjana T, Thomas GM, Sharma K, Skinner C, Schwartz CE, Stevenson RE, Fallin MD, Kaufmann W, Pletnikov M, Valle D, Haganir RL, Wang T. Gain-of-function glutamate receptor interacting protein 1 variants alter GluA2 recycling and surface distribution in patients

with autism. Proc Natl Acad Sci U S A 2011;108(12):4920-5. doi: [1102233108](https://doi.org/10.1073/pnas.1102233108) [pii] [10.1073/pnas.1102233108](https://doi.org/10.1073/pnas.1102233108) [published Online First: 2011/03/09]

38. Trotman M, Barad Z, Guevremont D, Williams J, Leitch B. Changes in the GRIP 1&2 scaffolding proteins in the cerebellum of the ataxic stargazer mouse. Brain Res 2014;1546:53-62. doi: [10.1016/j.brainres.2013.12.027](https://doi.org/10.1016/j.brainres.2013.12.027) [published Online First: 2014/01/02]

39. Ishiyama S, Schmidt H, Cooper BH, Brose N, Eilers J. Munc13-3 superprimers synaptic vesicles at granule cell-to-basket cell synapses in the mouse cerebellum. J Neurosci 2014;34(44):14687-96. doi: [10.1523/JNEUROSCI.2060-14.2014](https://doi.org/10.1523/JNEUROSCI.2060-14.2014) [published Online First: 2014/10/31]

40. Yu W, Du Y, Zou Y, Wang X, Stephani U, Lu Y. Smad anchor for receptor activation contributes to seizures in temporal lobe epilepsy. Synapse 2017;71(3) doi: [10.1002/syn.21957](https://doi.org/10.1002/syn.21957) [published Online First: 2016/12/31]

41. Weng JY, Lin YC, Lien CC. Cell type-specific expression of acid-sensing ion channels in hippocampal interneurons. J Neurosci 2010;30(19):6548-58. doi: [30/19/6548](https://doi.org/30/19/6548) [pii] [10.1523/JNEUROSCI.0582-10.2010](https://doi.org/10.1523/JNEUROSCI.0582-10.2010) [published Online First: 2010/05/14]

42. Lee JR. Protein tyrosine phosphatase PTPRT as a regulator of synaptic formation and neuronal development. BMB Rep 2015 doi: [3148](https://doi.org/3148) [pii] [published Online First: 2015/03/10]

43. Kang H, Han KA, Won SY, Kim HM, Lee YH, Ko J, Um JW. Slitrk Missense Mutations Associated with Neuropsychiatric Disorders Distinctively Impair Slitrk Trafficking and Synapse Formation. Front Mol Neurosci 2016;9:104. doi: [10.3389/fnmol.2016.00104](https://doi.org/10.3389/fnmol.2016.00104) [published Online First: 2016/11/05]
